# Supplementary material for: Electronic structure of aqueous-phase anatase titanium dioxide nanoparticles probed by liquid jet photoelectron spectroscopy
Source: Royal Society of Chemistry journal article supplement (doi:10.1039/c8ta09414d), 2018-12-20
Supplement: c8ta09414d1.pdf [file c8ta09414d1.pdf]

## Supplementary Information

### Electronic Structure of Aqueous-Phase Anatase Titanium Dioxide Nanoparticles Probed by Liquid Jet Photoelectron Spectroscopy

Hebatallah Ali,<sup>1,2</sup> Robert Seidel,<sup>3,4</sup> Arno Bergmann,<sup>3,#</sup> and Bernd Winter<sup>1,\*</sup>

<sup>1</sup> *Fritz-Haber-Institut der Max-Planck-Gesellschaft, Department of Molecular Physics, Faradayweg  
4-6, D-14195 Berlin, Germany*

<sup>2</sup> *Fachbereich Physik, Freie Universität Berlin, Arnimallee 14, D-14195 Berlin, Germany*

<sup>3</sup> *Helmholtz-Zentrum Berlin für Materialien und Energie, Albert-Einstein-Straße 15, D-12489 Berlin,  
Germany*

<sup>4</sup> *Humboldt-Universität zu Berlin, Department of Chemistry, Brook-Taylor-Str. 2, D-12489 Berlin,  
Germany*

<sup>#</sup> *Present address: Fritz-Haber-Institut der Max-Planck-Gesellschaft, Department of Interface  
Science, Faradayweg 4-6, D-14195 Berlin, Germany*

<sup>\*</sup> *Corresponding author: winter@fhi-berlin.mpg.de*

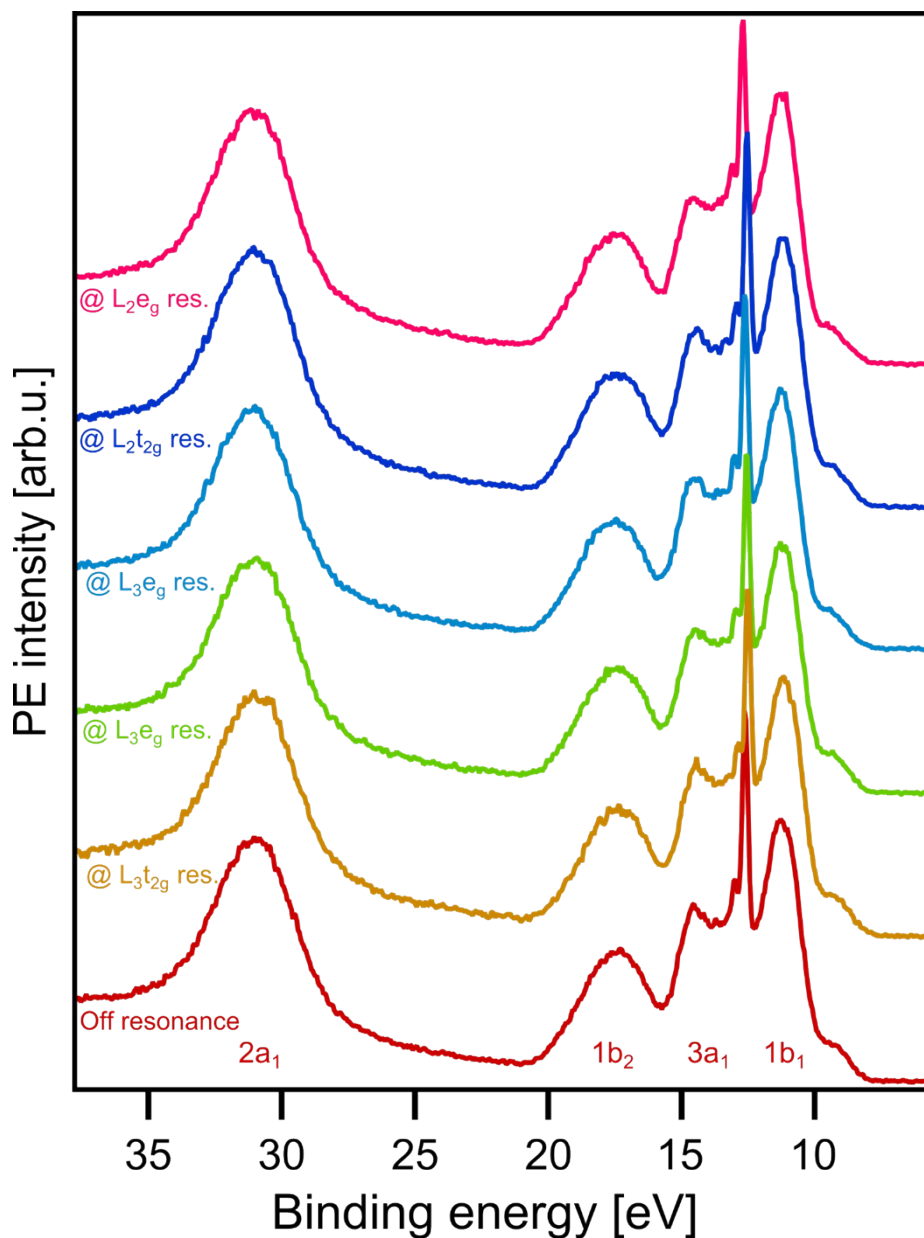

**Figure: SI 1**

**Figure SI-1** Valence band photoelectron spectra measured at off-resonance and on-resonance (A, B, C and D in Figure 1) photon energies for the [2:1]<sup>NH4+</sup> sample. The off-resonance spectrum was measured at 457 eV photon energy, while the on-resonance spectra were recorded at marked peaks in Figure 1: A (L<sub>3</sub>t<sub>2g</sub>), B (L<sub>3</sub>e<sub>g</sub> at two positions due to the sub-splitting), C (L<sub>2</sub>t<sub>2g</sub>) and D (L<sub>2</sub>e<sub>g</sub>). All spectra are almost identical, exhibiting no signal from Ti<sup>3+</sup>.

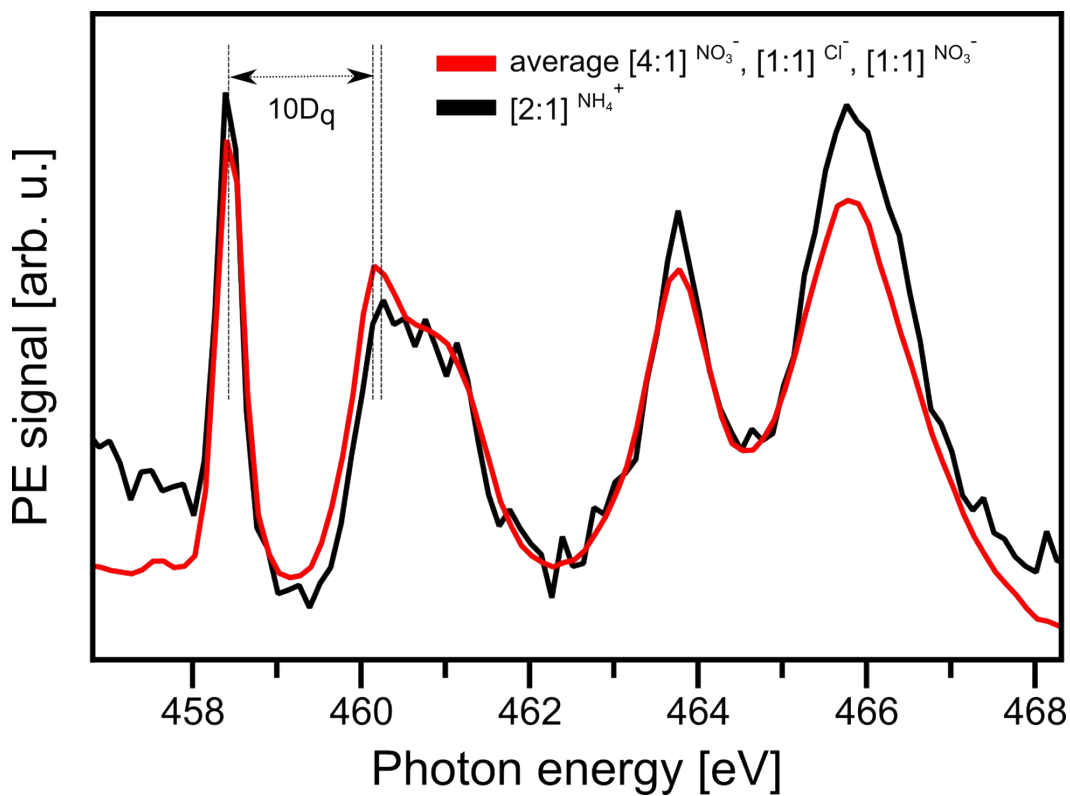

**Figure SI-2** Ti L-edge PEY-XA spectrum in black from anatase  $\text{TiO}_2$  NPs  $[2:1]^{\text{NH}_4^+}$  sample in comparison with an average spectrum of the  $\text{TiO}_2$  NPs  $[4:1]^{\text{NO}_3^-}$ ,  $[1:1]^{\text{Cl}^-}$  and  $[1:1]^{\text{NO}_3^-}$  solutions shown in Figure 1. The  $10D_q$  splitting is indicated by dashed lines.
